# Supplementary material for: Mre11 and Blm-Dependent Formation of ALT-Like Telomeres in Ku-Deficient Ustilago maydis
Source: PLOS journal article supplement (doi:10.1371/journal.pgen.1005570), 2015-10-22

S1 Fig

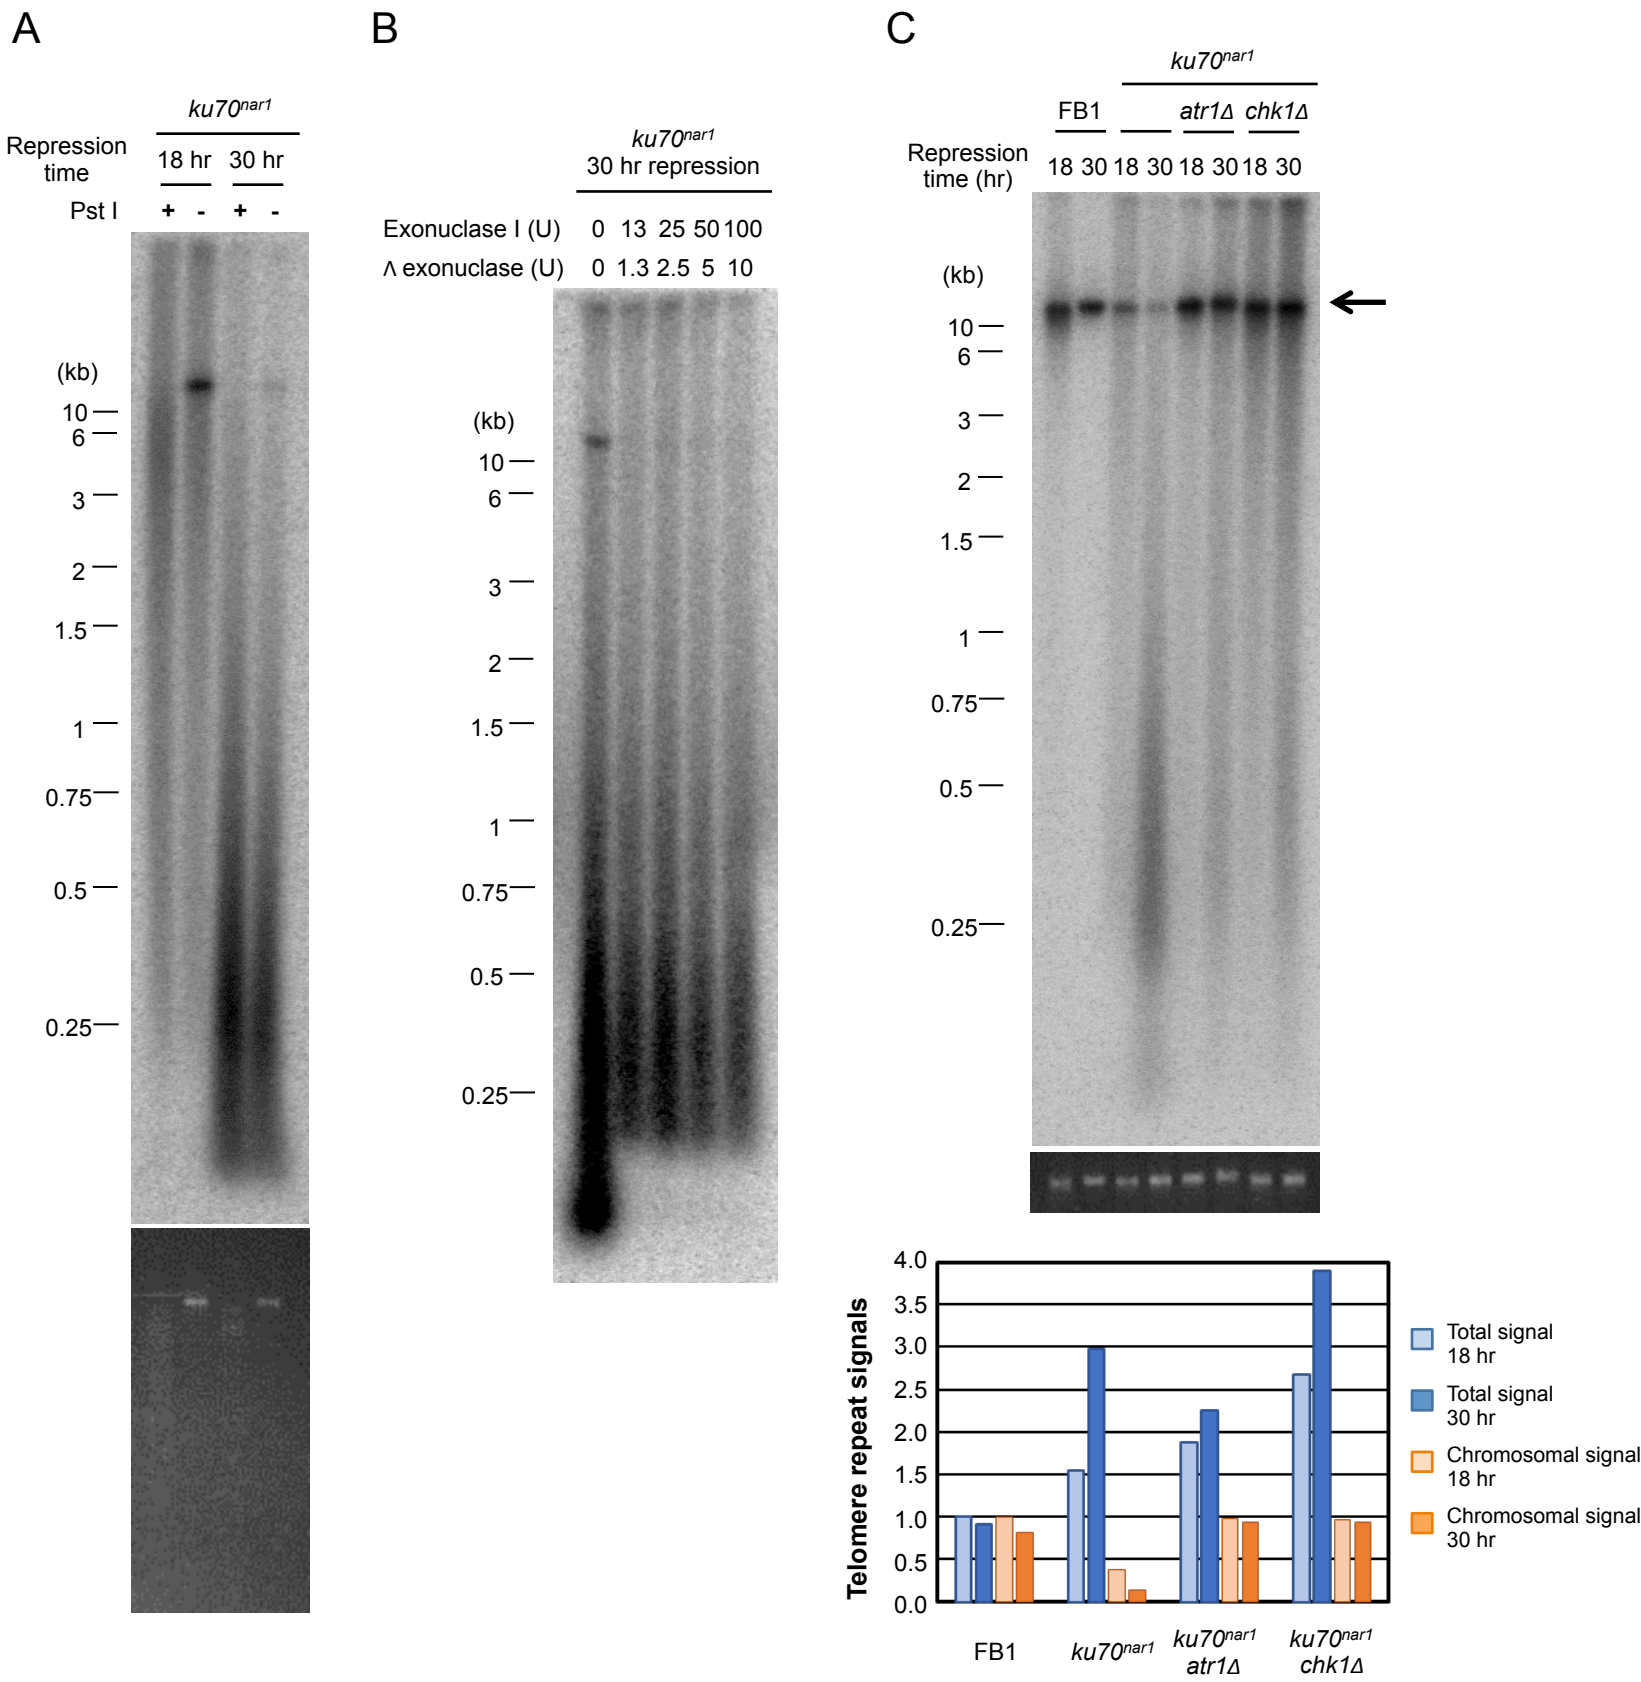

Supplement: S1 (10.1371/journal.pgen.1005570.s001) [file journal.pgen.1005570.s001]
